# Supplementary material
Source: publisher site journal article supplement (https://www.spandidos-publications.com/1814/downloadSupplementary)
Supplement: Supplementary file 1 [file downloadSupplementary]

Table SI. Baseline characteristics of the study subjects.

| Parameter         | HD          | AIS         | cCI        | TIA         | asymptCI    | DSWMH       | Other disease |
|-------------------|-------------|-------------|------------|-------------|-------------|-------------|---------------|
| Total number      | 139         | 226         | 57         | 43          | 17          | 121         | 30            |
| Age (years)       | 51.77±12.72 | 77.08±11.15 | 72.42±8.89 | 68.56±12.27 | 66.29±11.90 | 66.29±10.30 | 65.63±18.20   |
| Male sex          | 87 (62.6%)  | 129 (57.1%) | 18 (68.4%) | 23 (53.5%)  | 12 (70.6%)  | 71 (58.7%)  | 18 (60.0%)    |
| Hypertension      | 41 (29.5%)  | 182 (80.5%) | 48 (84.2%) | 34 (79.1%)  | 12 (70.6%)  | 63 (52.1%)  | 17 (56.7%)    |
| Diabetes          | 8 (5.8%)    | 59 (26.1%)  | 20 (35.1%) | 12 (27.9%)  | 5 (29.4%)   | 17 (14.0%)  | 2 (6.7%)      |
| Hyperlipidemia    | 28 (20.1%)  | 54 (23.9%)  | 24 (42.1%) | 15 (34.9%)  | 4 (23.5%)   | 42 (34.7%)  | 9 (30.0%)     |
| CVD               | 1 (0.7%)    | 22 (9.7%)   | 2 (3.5%)   | 3 (7.0%)    | 0 (0%)      | 7 (5.8%)    | 1 (3.3%)      |
| Obesity (BMI ≥25) | 43 (30.9%)  | 56 (24.8%)  | 5 (8.8%)   | 12 (27.9%)  | 2 (11.8%)   | 23 (19.0%)  | 9 (30.0%)     |
| Smoking           | 58 (41.7%)  | 113 (50%)   | 28 (49.1%) | 24 (55.8%)  | 10 (58.8%)  | 54 (44.6%)  | 15 (50.0%)    |

AIS, acute ischemic stroke; TIA, transient ischemic attack; HD, healthy donor; cCI, chronic cerebral infarction; asymptCI, asymptomatic cerebral infarction; DSWMH, deep and subcortical white matter hyperintensity; CVD, cardiovascular disease; BMI, body mass index.
